# Supplementary material for: Amphipathic emulsion binder for enhanced performance of lithium–sulfur batteries
Source: Royal Society of Chemistry journal article supplement (doi:10.1039/d4ta01037j), 2024-01-01
Supplement: d4ta01037j1.pdf [file d4ta01037j1.pdf]

## Supporting Information

### **Amphipathic Emulsion Binder for Enhanced Performance of Lithium-Sulfur Batteries**

Yuan He, <sup>a</sup> Xulong Jing, <sup>a</sup> Tianxing Lai, <sup>b</sup> Dong Jiang, <sup>c</sup> Chao Wan, <sup>\*a,d</sup> Pavel S. Postnikov, <sup>c</sup> Olga Guselnikova, <sup>c</sup> Lixin Xu, <sup>a</sup> Xiaojun He, <sup>\*a</sup> Yusuke Yamauchi <sup>f,g,h</sup> and Biyu Jin <sup>\*a</sup>

a. College of Chemistry and Chemical Engineering, Anhui University of Technology, Ma'anshan 243002, China. E-mail: wanchao@zju.edu.cn (C. Wan); xjhe@ahut.edu.cn (X. He); biyu.jin@austin.utexas.edu (B. Jin)

b. Materials Science & Engineering Program and Texas Materials Institute, The University of Texas at Austin, Austin, TX 78721 USA

c. Department of Life Science & Medical Bioscience, School of Advanced Science and Engineering, Waseda University, 2-2 Wakamatsu-cho, Shinjuku, Tokyo 162-8480, Japan

d. College of Chemical and Biological Engineering, Zhejiang University, Hangzhou 310058, China.

e. Research School of Chemistry and Applied Biomedical Sciences, Tomsk Polytechnic University, Tomsk 6340034, Russian Federation

f. Australian Institute for Bioengineering and Nanotechnology (AIBN), The University of Queensland, Brisbane, Queensland 4072, Australia

g. Department of Materials Process Engineering, Graduate School of Engineering, Nagoya University, Nagoya 464-8603, Japan

h. Department of Chemical and Biomolecular Engineering, Yonsei University, Seoul 03722, South Korea

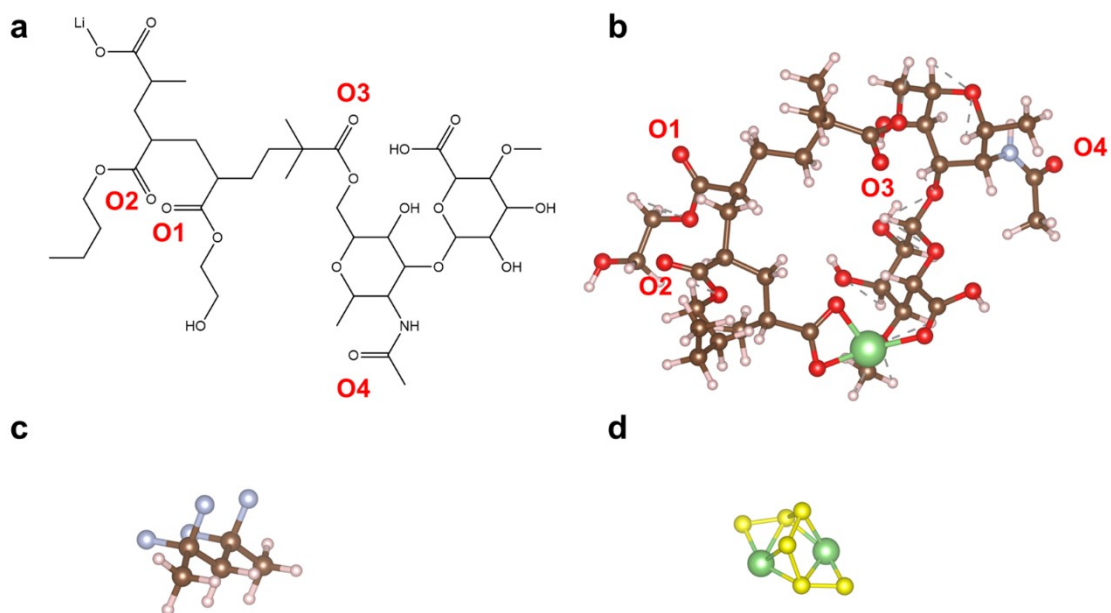

**Figure S1.** (a) The chemical structure of simplified HBEA. Relaxed structures of (b) HBEA, (c) PVDF, and (d)  $\text{Li}_2\text{S}_6$ .

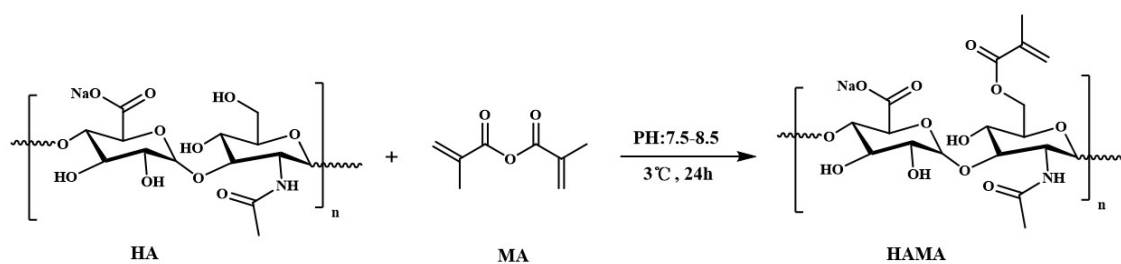

**Figure S2.** Synthesis process of HAMA.

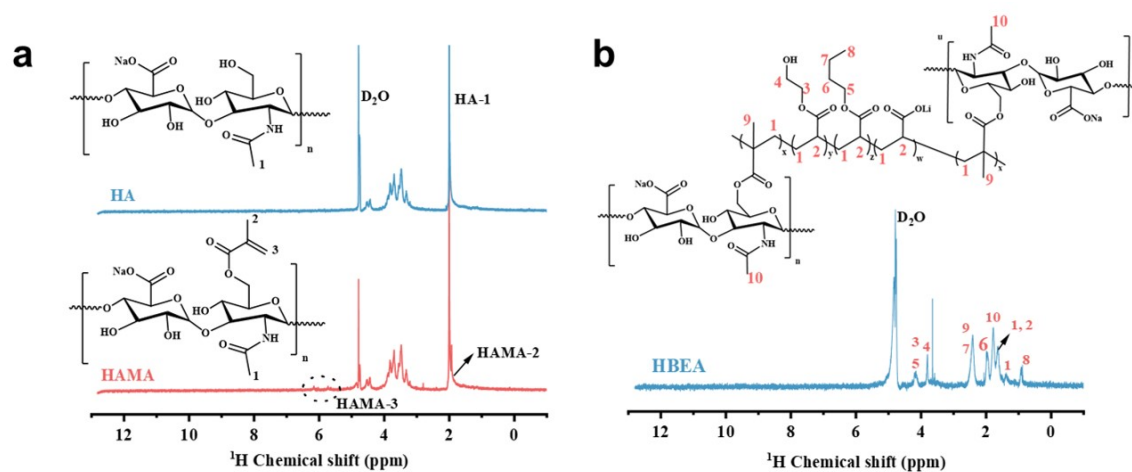

**Figure S3.**  $^1\text{H}$  NMR spectra of HA(a), HAMA(a) and HBEA (b) composite.

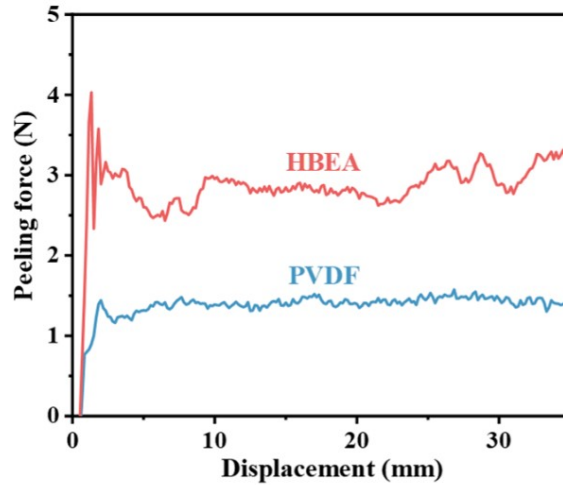

**Figure S4.** Peeling force-displacement curves of HBEA and PVDF binders.

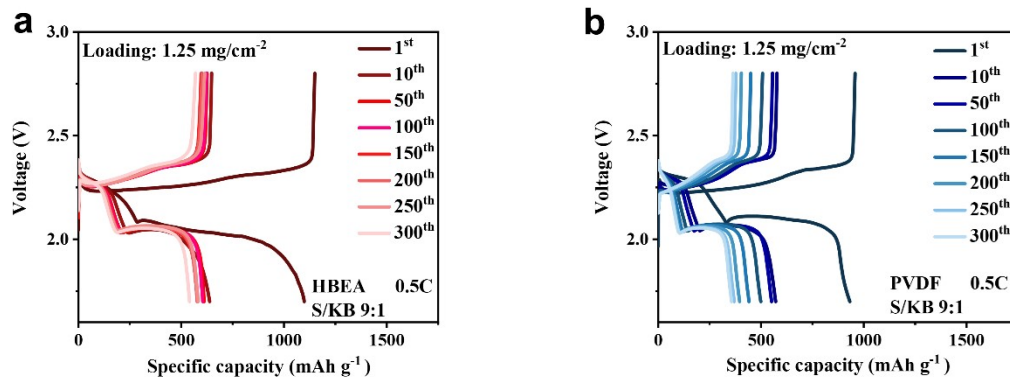

**Figure S5.** Charge /discharge voltage profiles of (a) S/HBEA and (b) S/PVDF.

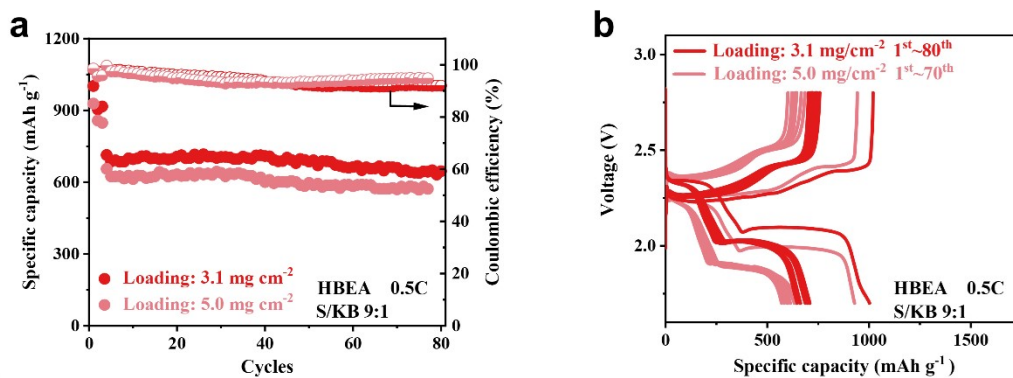

**Figure S6.** (a) Cycling performances and Coulombic efficiency and (d) Charge /discharge voltage profiles of high mass loading S/HBEA.

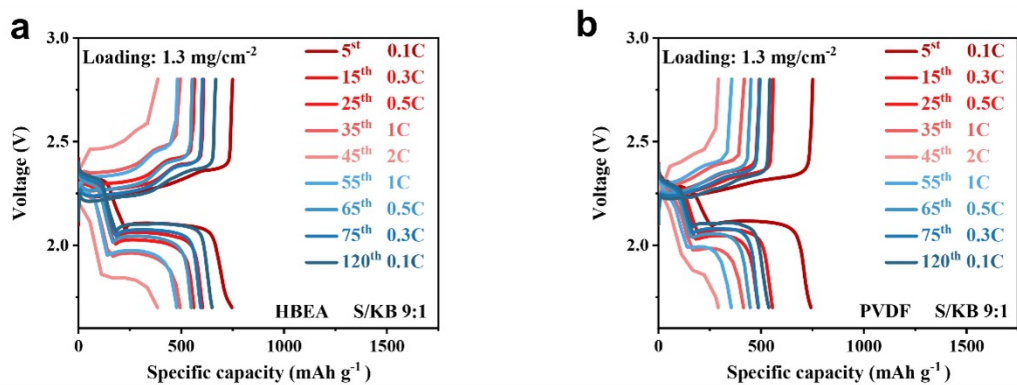

**Figure S7.** Charge/discharge voltage profiles of (a) S/HBEA and (b) S/PVDF cells at different rate.

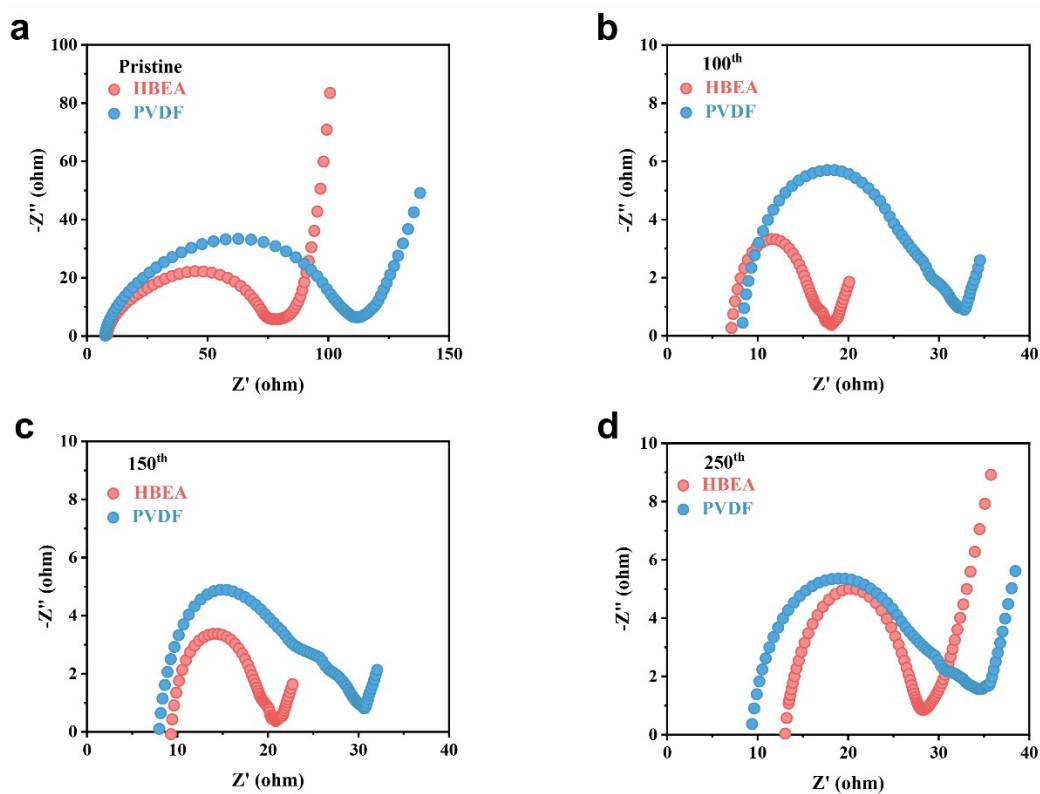

**Figure S8.** Nyquist plots of S/HBEA and S/PVDF cells (a) before cycling and after (b) 100 cycles, (c) 150 cycles, and (d) 250 cycles.

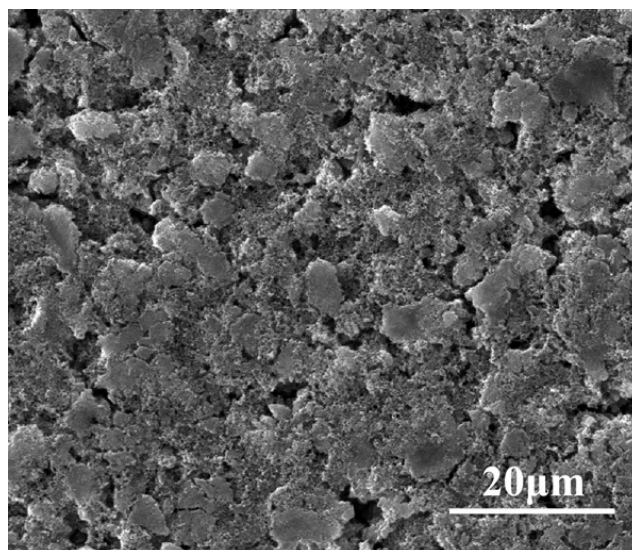

**Figure S9.** SEM of cycled S/HBEA cathode

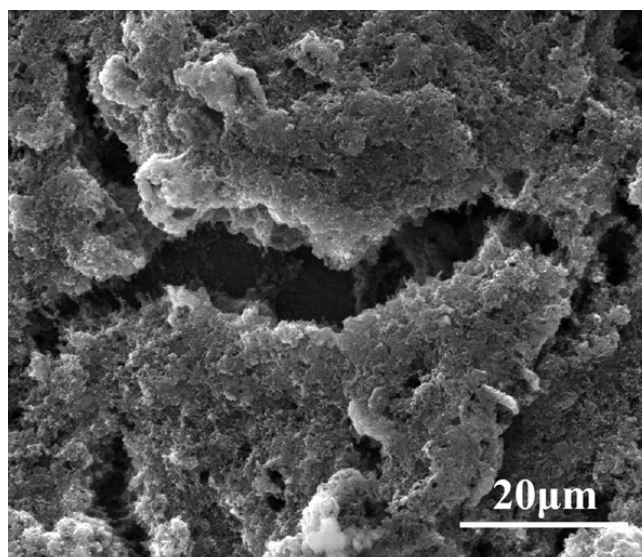

**Figure S10.** SEM of cycled S/PVDF cathode

**Table S1.**  $\text{Li}^+$  diffusion coefficients of HBEA and PVDF sulfur cathodes calculated from the CV data.

| Sample<br>(sulfur cathode) | $\text{Li}^+$ diffusion coefficients ( $D_{\text{Li}^+}$ , $\text{cm}^2 \text{s}^{-1}$ ) |                      |                      |
|----------------------------|------------------------------------------------------------------------------------------|----------------------|----------------------|
|                            | $D_{\text{O}}$                                                                           | $D_{\text{R}}$       | $D_{\text{R}'}$      |
| HBEA                       | $8.6 \times 10^{-7}$                                                                     | $5.5 \times 10^{-7}$ | $1.4 \times 10^{-8}$ |
| PVDF                       | $5.5 \times 10^{-7}$                                                                     | $2.9 \times 10^{-7}$ | $7.1 \times 10^{-9}$ |
